# Supplementary material for: Process optimization for the synthesis of functionalized Au@AgNPs for specific detection of Hg2+ based on quality by design (QbD)
Source: Royal Society of Chemistry journal article supplement (doi:10.1039/d2ra01500e), 2022-01-01
Supplement: d2ra01500e1.pdf [file d2ra01500e1.pdf]

## Electronic Supplementary Material (ESI) for RSC Advances

### Process optimization for the synthesis of functionalized Au@AgNPs for specific detection of Hg<sup>2+</sup> based on quality by design (QbD)

Hui Zhang<sup>a\*</sup>, Baoling Wang<sup>a</sup>, Xiaoyi Liu<sup>a</sup>, Hongxu Zhang<sup>a</sup>, Jiangyu Yao<sup>a</sup>, Xingchu Gong<sup>b</sup>, Jizhong Yan<sup>a\*</sup>

<sup>a</sup>College of Pharmaceutical Science, Zhejiang University of Technology, No. 18, Chaowang Road, Hangzhou 310014, China

<sup>b</sup>College of Pharmaceutical Sciences, Zhejiang University, Hangzhou 310058, China

Corresponding Author: Hui Zhang  
Email: zh889@zjut.edu.cn, [yjz@zjut.edu.cn](mailto:yjz@zjut.edu.cn)

**Table S 1 Coded and uncoded values of Plackett-Burman factors**

| CPPs                          |       | Code value |     |
|-------------------------------|-------|------------|-----|
|                               |       | -1         | 1   |
| trisodium citrate dosage (μL) | $X_1$ | 400        | 600 |
| gold nanosynthesis time (min) | $X_2$ | 5          | 10  |
| ascorbic acid dosage (μL)     | $X_3$ | 150        | 200 |
| silver nitrate dosage (μL)    | $X_4$ | 150        | 200 |
| oscillation time (min)        | $X_5$ | 10         | 15  |
| incubation time (min)         | $X_6$ | 3          | 5   |

**Table S2 Box-Behnken design experiment and results**

| Number | Critical process parameters (CPPs) |       |       | Critical quality attributes (CQAs) |
|--------|------------------------------------|-------|-------|------------------------------------|
|        | $X_1$                              | $X_2$ | $X_4$ | $R$                                |
| 1      | 500                                | 7.5   | 175   | 42655                              |
| 2      | 500                                | 7.5   | 175   | 44433                              |
| 3      | 500                                | 7.5   | 175   | 43149                              |
| 4      | 500                                | 7.5   | 175   | 41501                              |
| 5      | 500                                | 7.5   | 175   | 44603                              |
| 6      | 500                                | 10    | 150   | 40413                              |
| 7      | 500                                | 10    | 200   | 32942                              |
| 8      | 500                                | 5.0   | 150   | 40701                              |
| 9      | 500                                | 5.0   | 200   | 37883                              |
| 10     | 400                                | 5.0   | 175   | 16391                              |

|    |     |     |     |       |
|----|-----|-----|-----|-------|
| 11 | 400 | 7.5 | 175 | 17567 |
| 12 | 400 | 7.5 | 200 | 10990 |
| 13 | 400 | 10  | 175 | 14444 |
| 14 | 600 | 5.0 | 175 | 35840 |
| 15 | 600 | 7.5 | 150 | 41382 |
| 16 | 600 | 7.5 | 200 | 27133 |
| 17 | 600 | 10  | 175 | 40063 |

**Table S3 Regression equation**

| Regression equation model        |                                                   |
|----------------------------------|---------------------------------------------------|
| Final Equation in Terms of Coded | $R1 = -6.79X_5 + 005 + 1568X_1 + 7189X_2$         |
| Factors:                         | $+ 3203X_3 - 2.9X_1X_2 + 0.11X_1X_3 - 1.98X_2X_3$ |
|                                  | $- 1.42X_1^2 - 400X_2^2 - 9.5X_3^2$               |
